# Supplementary material
Source: PubMed Central journal article supplement (PMC4884481)
Supplement: NIHMS781445-supplement-2.pdf [file NIHMS781445-supplement-2.pdf]

Methylation (%) of CpG sites

|                   | Sample ID | neg 11 | neg 5 | neg 3 | 2    | 4    | 11   | 13   | 17   | 23    | 32   | 35   | 47    | 58   | 65   | 73    | 78   | 82    | 93   | 95   | Mean | Stdev | Max   | Min  |
|-------------------|-----------|--------|-------|-------|------|------|------|------|------|-------|------|------|-------|------|------|-------|------|-------|------|------|------|-------|-------|------|
| EBV+<br>(Type II) | JC5       | 0.0    | 23.1  | 0.0   | 17.2 | 22.0 | 0.0  | 0.0  | 0.0  | 0.0   | 14.3 | 21.0 | 0.0   | 0.0  | 24.2 | 0.0   | 37.2 | 0.0   | 19.7 | 0.0  | 9.4  | 12.1  | 37.2  | 0.0  |
|                   | Dana      | 4.6    | 6.6   | 3.8   | 2.4  | 2.3  | 2.8  | 2.8  | 4.1  | 3.0   | 3.7  | 2.4  | 4.0   | 4.8  | 4.8  | 3.8   | 5.7  | 6.0   | 6.4  | 4.2  | 4.1  | 1.4   | 6.6   | 2.3  |
|                   | Boston    | 21.6   | 3.0   | 8.2   | 17.8 | 13.7 | 43.6 | 1.0  | 15.9 | 13.9  | 8.3  | 11.7 | 20.8  | 11.2 | 9.8  | 11.6  | 12.9 | 9.7   | 13.7 | 7.1  | 13.4 | 9.0   | 43.6  | 1.0  |
|                   | Alwife    | 8.0    | 8.9   | 5.4   | 3.1  | 6.4  | 4.9  | 4.3  | 6.2  | 3.9   | 6.4  | 4.9  | 7.3   | 6.5  | 8.1  | 8.8   | 9.1  | 9.5   | 11.9 | 6.6  | 6.9  | 2.2   | 11.9  | 3.1  |
| EBV+<br>(Type I)  | JY        | 4.2    | 4.1   | 3.2   | 6.0  | 4.2  | 7.0  | 2.1  | 4.1  | 4.9   | 6.1  | 2.7  | 8.5   | 4.4  | 4.1  | 4.3   | 6.4  | 7.5   | 8.0  | 4.2  | 5.1  | 1.8   | 8.5   | 2.1  |
|                   | P3HR1     | 12.3   | 3.0   | 6.4   | 18.1 | 7.9  | 33.9 | 1.1  | 15.3 | 8.6   | 10.5 | 5.0  | 9.1   | 7.0  | 4.9  | 8.6   | 10.9 | 6.7   | 8.9  | 4.4  | 9.6  | 7.2   | 33.9  | 1.1  |
|                   | Rael      | 89.1   | 92.6  | 82.0  | 32.3 | 27.8 | 50.3 | 42.9 | 60.3 | 93.9  | 77.5 | 74.7 | 100.0 | 86.4 | 78.3 | 94.9  | 98.6 | 75.4  | 67.7 | 52.2 | 72.5 | 22.4  | 100.0 | 27.8 |
|                   | Akata     | 97.3   | 93.2  | 91.1  | 96.3 | 89.5 | 94.4 | 88.0 | 86.8 | 100.0 | 93.6 | 94.2 | 100.0 | 91.2 | 85.3 | 100.0 | 97.8 | 100.0 | 92.5 | 74.2 | 92.9 | 6.5   | 100.0 | 74.2 |
| EBV-              | Mutu      | 100.0  | 72.8  | 94.6  | 95.8 | 85.3 | 89.6 | 57.0 | 90.3 | 100.0 | 88.8 | 90.9 | 100.0 | 91.3 | 82.0 | 100.0 | 97.2 | 98.5  | 93.6 | 71.0 | 89.4 | 11.6  | 100.0 | 57.0 |
|                   | DG75      | 7.1    | 5.8   | 5.9   | 7.0  | 7.5  | 7.4  | 4.2  | 6.2  | 7.3   | 4.6  | 6.8  | 6.5   | 5.9  | 7.8  | 6.8   | 6.5  | 9.6   | 10.2 | 6.1  | 6.8  | 1.4   | 10.2  | 4.2  |
|                   | Ramos     | 42.0   | 25.5  | 51.5  | 29.8 | 26.2 | 28.3 | 29.3 | 34.4 | 31.6  | 33.2 | 30.8 | 30.1  | 37.6 | 29.3 | 36.4  | 34.4 | 47.5  | 47.3 | 18.6 | 33.9 | 8.3   | 51.5  | 18.6 |

|                   | Sample ID | 131  | 134  | 146  | 148  | 154  | 158  | 176  | 187  | 190  | 200   | 205  | 215   | 218  | 230  | 240  | 249  | 251  | 255  | 261   | 270   | 281   | 283  | 285  | 287  | 293  | 321   | 326  | 330   | 345  | 360  | 362  | 392  | 443  | Mean | stdev | Max   | Min  |
|-------------------|-----------|------|------|------|------|------|------|------|------|------|-------|------|-------|------|------|------|------|------|------|-------|-------|-------|------|------|------|------|-------|------|-------|------|------|------|------|------|------|-------|-------|------|
| EBV+<br>(Type II) | JC5       | 1.4  | 2.4  | 5.2  | 0.0  | 1.6  | 1.9  | 7.4  | 2.5  | 1.4  | 3.1   | 1.5  | 3.0   | 6.2  | 1.6  | 8.8  | 11.6 | 1.4  | 2.6  | 2.8   | 1.6   | 9.2   | 1.3  | 1.1  | 0.0  | 2.7  | 1.4   | 4.1  | 1.9   | 1.3  | 3.5  | 0.7  | 2.0  | 4.2  | 3.1  | 2.7   | 11.6  | 0.0  |
|                   | Dana      | 2.0  | 0.0  | 2.8  | 1.6  | 4.7  | 0.0  | 8.0  | 2.1  | 0.0  | 3.2   | 0.0  | 2.3   | 7.1  | 1.9  | 2.8  | 0.0  | 0.0  | 4.4  | 6.5   | 3.4   | 2.9   | 0.0  | 2.6  | 3.0  | 2.5  | 1.2   | 1.1  | 0.0   | 0.9  | 1.9  | 0.0  | 1.8  | 12.7 | 2.5  | 2.8   | 12.7  | 0.0  |
|                   | Boston    | 1.3  | 6.1  | 1.6  | 0.7  | 5.9  | 2.1  | 9.2  | 6.2  | 2.0  | 2.8   | 1.6  | 3.3   | 4.1  | 1.2  | 4.5  | 8.1  | 1.4  | 1.4  | 1.1   | 0.9   | 2.6   | 0.0  | 0.6  | 3.0  | 5.6  | 2.9   | 1.8  | 2.3   | 2.9  | 6.6  | 1.1  | 1.1  | 9.4  | 3.2  | 2.6   | 9.4   | 0.0  |
|                   | Alwife    | 1.8  | 0.9  | 2.4  | 2.2  | 3.2  | 1.4  | 3.7  | 4.4  | 5.0  | 1.2   | 0.9  | 1.7   | 2.9  | 1.7  | 2.2  | 4.8  | 1.1  | 4.4  | 3.8   | 4.2   | 3.2   | 1.0  | 1.7  | 1.1  | 2.8  | 2.1   | 3.3  | 4.1   | 1.7  | 4.2  | 0.7  | 0.9  | 4.5  | 2.6  | 1.4   | 5.0   | 0.7  |
| EBV+<br>(Type I)  | JY        | 1.0  | 2.4  | 2.9  | 0.9  | 2.9  | 3.7  | 3.0  | 2.4  | 3.8  | 1.3   | 1.5  | 2.8   | 2.3  | 1.3  | 1.7  | 5.4  | 1.9  | 3.8  | 2.2   | 4.1   | 4.3   | 0.9  | 1.2  | 1.0  | 2.9  | 3.0   | 3.1  | 4.1   | 4.7  | 3.3  | 2.6  | 2.0  | 8.6  | 2.8  | 1.6   | 8.6   | 0.9  |
|                   | P3HR1*    | 1.2  | 1.7  | 3.4  | 1.7  | 1.6  | 4.6  | 3.7  | 5.6  | 2.9  | 10.2  | 1.3  | 2.5   | 5.1  | 1.5  | 2.5  | 8.9  | 3.6  | 2.1  | 2.0   | 2.4   | 4.7   | 0.0  | 1.1  | 1.2  | 4.8  | 1.8   | 3.4  | 3.3   | 4.2  | 2.1  | 3.4  | 2.5  | 9.8  | 3.3  | 2.4   | 10.2  | 0.0  |
|                   | Rael      | 67.8 | 62.6 | 60.6 | 29.1 | 21.4 | 52.3 | 35.6 | 31.7 | 51.5 | 81.9  | 19.3 | 56.3  | 33.3 | 39.6 | 87.3 | 27.8 | 23.2 | 24.9 | 38.9  | 71.9  | 50.4  | 47.0 | 37.4 | 47.8 | 63.2 | 82.5  | 89.0 | 78.6  | 79.7 | 59.4 | 55.0 | 80.7 | 28.3 | 52.0 | 21.4  | 89.0  | 19.3 |
|                   | Akata     | 98.0 | 98.8 | 95.3 | 88.5 | 94.6 | 92.9 | 95.8 | 98.0 | 92.3 | 100.0 | 89.7 | 100.0 | 92.7 | 96.1 | 96.2 | 96.5 | 94.3 | 95.3 | 100.0 | 100.0 | 99.4  | 84.6 | 78.3 | 76.5 | 90.9 | 100.0 | 96.9 | 100.0 | 88.4 | 92.4 | 74.8 | 65.5 | 89.7 | 92.5 | 8.3   | 100.0 | 65.5 |
| EBV-              | Mutu      | 96.9 | 99.9 | 97.9 | 84.5 | 91.0 | 93.2 | 95.1 | 96.6 | 91.3 | 100.0 | 89.2 | 100.0 | 91.6 | 95.1 | 96.8 | 96.2 | 96.1 | 97.1 | 100.0 | 100.0 | 100.0 | 80.4 | 72.1 | 67.7 | 90.6 | 94.3  | 95.6 | 94.9  | 94.7 | 96.7 | 88.1 | 96.3 | 65.5 | 92.3 | 8.9   | 100.0 | 65.5 |
|                   | Ramos     | 69.7 | 74.1 | 68.8 | 55.0 | 55.5 | 60.5 | 70.5 | 72.7 | 65.6 | 87.6  | 55.4 | 77.1  | 50.4 | 39.0 | 73.4 | 74.5 | 64.6 | 68.5 | 75.4  | 90.7  | 77.5  | 52.2 | 52.3 | 52.2 | 70.8 | 71.7  | 74.0 | 53.1  | 55.5 | 32.6 | 27.1 | 61.6 | 65.9 | 63.5 | 14.2  | 90.7  | 27.1 |
|                   | DG75      | 2.3  | 2.7  | 4.2  | 0.9  | 1.2  | 2.6  | 3.1  | 5.2  | 0.9  | 9.2   | 1.5  | 2.2   | 1.9  | 1.5  | 1.9  | 1.4  | 2.9  | 5.6  | 3.7   | 2.1   | 4.6   | 0.0  | 1.4  | 2.1  | 5.7  | 3.3   | 4.0  | 3.8   | 4.1  | 3.0  | 1.4  | 4.4  | 5.1  | 3.0  | 1.8   | 9.2   | 0.0  |
|                   | BL41      | 2.2  | 1.6  | 1.2  | 0.0  | 1.2  | 1.4  | 1.5  | 1.7  | 2.0  | 2.6   | 0.0  | 2.1   | 1.7  | 2.1  | 1.1  | 2.2  | 1.8  | 1.3  | 1.5   | 1.3   | 1.5   | 0.0  | 1.1  | 1.0  | 1.4  | 9.0   | 24.3 | 18.5  | 21.6 | 29.5 | 8.2  | 13.5 | 60.5 | 6.7  | 12.3  | 80.5  | 0.0  |
| BL30              | 1.6       | 1.2  | 1.3  | 0.9  | 1.1  | 1.2  | 1.6  | 1.6  | 1.9  | 2.1  | 0.8   | 2.1  | 1.3   | 1.7  | 1.1  | 1.8  | 1.2  | 1.5  | 1.1  | 1.6   | 1.6   | 0.7   | 0.9  | 0.0  | 1.6  | 7.8  | 20.5  | 16.1 | 17.5  | 23.0 | 6.5  | 10.7 | 56.5 | 5.8  | 11.0 | 56.5  | 0.0   |      |

| Sample ID      | neg 11 | neg 5 | neg 3 | 2    | 4    | 11   | 13   | 17   | 23    | 32   | 35   | 47    | 58   | 65   | 73    | 78    | 82    | 93   | 95   | Mean | Stdev | Max   | Min  |
|----------------|--------|-------|-------|------|------|------|------|------|-------|------|------|-------|------|------|-------|-------|-------|------|------|------|-------|-------|------|
| Mutu Bulk Cntl | 100.0  | 90.2  | 92.4  | 94.5 | 86.9 | 89.8 | 73.4 | 83.3 | 100.0 | 83.4 | 94.2 | 100.0 | 87.7 | 84.3 | 100.0 | 99.0  | 100.0 | 85.7 | 65.6 | 90.0 | 9.6   | 100.0 | 65.6 |
| Mutu Bulk Zeb  | 95.2   | 71.1  | 90.2  | 84.9 | 77.8 | 83.4 | 58.1 | 87.2 | 100.0 | 73.3 | 89.6 | 100.0 | 74.0 | 70.6 | 100.0 | 100.0 | 90.9  | 78.1 | 61.2 | 83.4 | 13.1  | 100.0 | 58.1 |
| Mutu Bulk 6A   | 78.2   | 57.9  | 72.8  | 68.9 | 60.5 | 66.2 | 53.6 | 61.8 | 81.7  | 57.4 | 63.8 | 74.2  | 57.6 | 61.0 | 89.9  | 73.3  | 77.6  | 64.6 | 46.3 | 66.7 | 10.8  | 89.9  | 46.3 |

| Sample ID      | 131  | 134  | 146  | 148  | 154  | 158  | 176  | 187  | 190  | 200  | 205  | 215   | 218  | 230  | 240  | 249  | 251  | 255  | 261   | 270   | 281   | 283  | 285  | 287  | 293  | 321  | 326  | 330  | 345  | 360   | 362  | 392  | 443  | Mean | stdev | Max   | Min  |     |
|----------------|------|------|------|------|------|------|------|------|------|------|------|-------|------|------|------|------|------|------|-------|-------|-------|------|------|------|------|------|------|------|------|-------|------|------|------|------|-------|-------|------|-----|
| Mutu Bulk Cntl | 97.0 | 99.7 | 99.1 | 83.0 | 90.8 | 89.7 | 93.9 | 97.6 | 91.1 | 88.3 | 91.0 | 100.0 | 96.8 | 95.8 | 96.7 | 92.0 | 95.6 | 96.1 | 100.0 | 100.0 | 100.0 | 81.5 | 69.6 | 60.8 | 87.2 | 96.9 | 97.3 | 95.7 | 89.4 | 96.6  | 76.6 | 95.4 | 69.5 | 91.5 | 9.9   | 100.0 | 60.6 |     |
| Mutu Bulk Zeb  | 84.6 | 91.8 | 89.4 | 76.9 | 82.6 | 86.4 | 89.6 | 92.2 | 84.3 | 99.8 | 81.2 | 100.0 | 88.6 | 86.5 | 87.3 | 88.8 | 87.9 | 91.9 | 95.0  | 100.0 | 96.0  | 78.0 | 75.4 | 65.8 | 82.5 | 91.5 | 82.7 | 89.5 | 89.6 | 89.0  | 78.9 | 84.9 | 49.0 | 86.0 | 9.9   | 100.0 | 49.0 |     |
| Mutu Bulk 6A   | 86.4 | 94.2 | 90.2 | 73.0 | 69.5 | 75.9 | 86.3 | 88.6 | 89.1 | 95.0 | 70.8 | 99.2  | 82.9 | 80.4 | 84.7 | 81.7 | 79.9 | 77.0 | 90.3  | 97.2  | 95.7  | 69.2 | 65.2 | 60.8 | 72.9 | 70.3 | 81.2 | 79.5 | 57.4 | 66.3  | 40.0 | 64.8 | 44.9 | 77.6 | 14.3  | 99.2  | 40.0 |     |
| Ramos (B95-9)  | 67.8 | 96.8 | 63.0 | 78.4 | 84.2 | 63.7 | 43.3 | 42.6 | 84.7 | 93.6 | 47.4 | 71.9  | 72.9 | 58.0 | 87.1 | 66.6 | 67.5 | 72.5 | 86.4  | 97.6  | 75.8  | 74.1 | 73.5 | 60.0 | 82.8 | 72.0 | 79.9 | 76.0 | 84.8 | 100.0 | 34.6 | 68.7 | 83.8 | 73.1 | 15.9  | 100.0 | 34.6 |     |
| BL41 (B652)    | 1.6  | 1.4  | 1.5  | 0.9  | 1.1  | 1.1  | 1.9  | 2.2  | 1.8  | 1.4  | 0.8  | 1.9   | 1.1  | 1.2  | 1.0  | 1.6  | 1.0  | 1.4  | 1.0   | 1.7   | 1.8   | 0.8  | 1.0  | 0.0  | 1.3  | 6.9  | 20.3 | 16.7 | 19.0 | 25.6  | 6.6  | 9.6  | 54.2 | 5.8  | 10.9  | 54.2  | 0.0  |     |
| BL30 (B652)    | 0.0  | 2.0  | 0.0  | 2.2  | 0.0  | 1.9  | 4.6  | 2.9  | 0.0  | 0.0  | 0.0  | 2.8   | 0.0  | 0.0  | 0.0  | 2.2  | 0.0  | 0.0  | 0.0   | 0.0   | 0.0   | 2.4  | 0.0  | 2.1  | 0.0  | 0.0  | 7.3  | 22.5 | 18.2 | 21.4  | 28.2 | 6.7  | 9.6  | 55.2 | 5.8   | 11.4  | 55.2 | 0.0 |
