# Supplementary material
Source: PubMed Central journal article supplement (PMC4884481)

**A.**

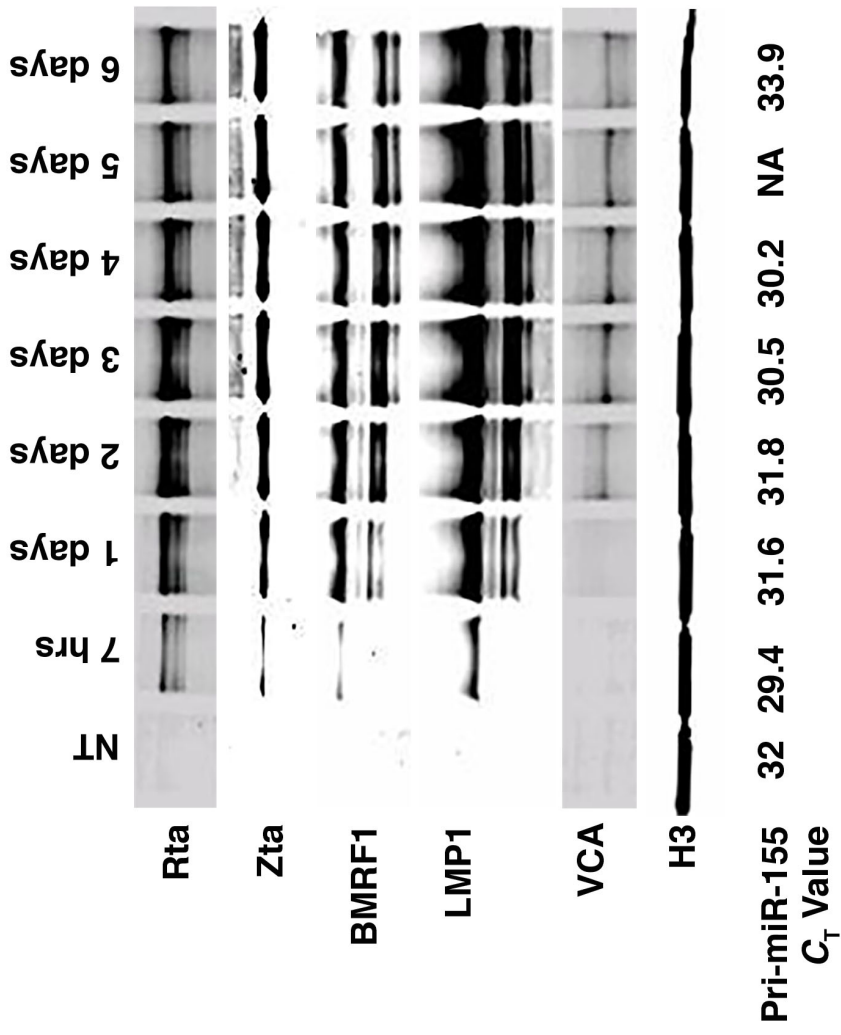

**B.**

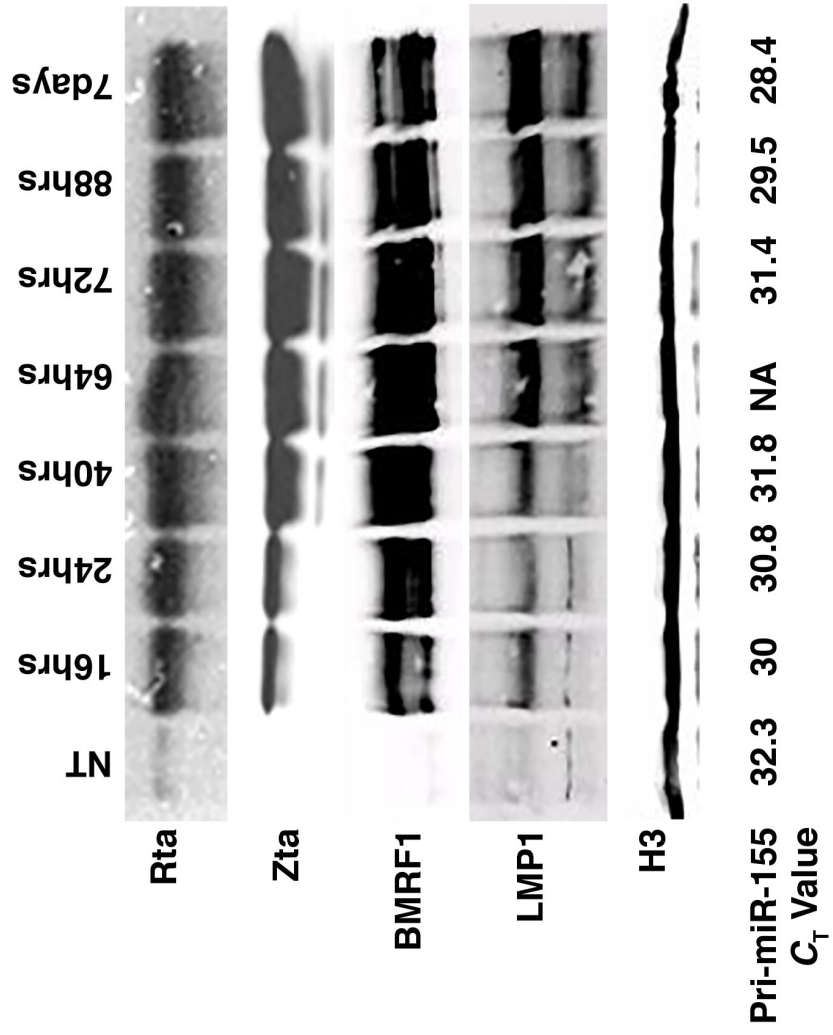

Supplement: NIHMS781445-supplement-1.pdf [file NIHMS781445-supplement-1.pdf]
